# Supplementary material for: Peroxisome Metabolism Contributes to PIEZO2-Mediated Mechanical Allodynia
Source: MDPI journal article supplement (doi:10.3390/cells11111842), 2022-06-04
Supplement: s1 [file s1]

**Table S4 Enrichment by Go Process**

| #  | Processes                                                | p-value   |
|----|----------------------------------------------------------|-----------|
| 1  | response to organic cyclic compound                      | 1.130E-23 |
| 2  | response to oxygen-containing compound                   | 1.019E-22 |
| 3  | circulatory system development                           | 6.559E-22 |
| 4  | response to organic substance                            | 2.703E-20 |
| 5  | response to hormone                                      | 4.769E-20 |
| 6  | tube development                                         | 1.400E-19 |
| 7  | tissue development                                       | 1.830E-19 |
| 8  | response to lipid                                        | 1.912E-19 |
| 9  | cardiovascular system development                        | 9.926E-19 |
| 10 | vasculature development                                  | 2.686E-18 |
| 11 | positive regulation of response to stimulus              | 9.099E-18 |
| 12 | positive regulation of multicellular organismal process  | 1.014E-17 |
| 13 | regulation of multicellular organismal process           | 1.697E-17 |
| 14 | blood vessel development                                 | 1.789E-17 |
| 15 | tube morphogenesis                                       | 2.415E-17 |
| 16 | tissue remodeling                                        | 6.181E-17 |
| 17 | positive regulation of developmental process             | 1.055E-16 |
| 18 | response to endogenous stimulus                          | 1.071E-16 |
| 19 | regulation of cell population proliferation              | 1.200E-16 |
| 20 | animal organ development                                 | 1.517E-16 |
| 21 | response to external stimulus                            | 1.652E-16 |
| 22 | response to drug                                         | 1.882E-16 |
| 23 | regulation of response to stimulus                       | 4.865E-16 |
| 24 | negative regulation of multicellular organismal process  | 6.675E-16 |
| 25 | regulation of developmental process                      | 9.371E-16 |
| 26 | anatomical structure morphogenesis                       | 9.384E-16 |
| 27 | response to chemical                                     | 9.497E-16 |
| 28 | blood vessel morphogenesis                               | 1.101E-15 |
| 29 | system development                                       | 1.151E-15 |
| 30 | response to other organism                               | 1.380E-15 |
| 31 | response to external biotic stimulus                     | 1.497E-15 |
| 32 | negative regulation of cell population proliferation     | 1.942E-15 |
| 33 | multicellular organism development                       | 2.435E-15 |
| 34 | mesenchyme morphogenesis                                 | 2.852E-15 |
| 35 | regulation of molecular function                         | 3.163E-15 |
| 36 | response to biotic stimulus                              | 3.755E-15 |
| 37 | regulation of locomotion                                 | 4.700E-15 |
| 38 | tissue morphogenesis                                     | 7.252E-15 |
| 39 | muscle structure development                             | 7.488E-15 |
| 40 | regulation of response to stress                         | 8.091E-15 |
| 41 | heart development                                        | 8.602E-15 |
| 42 | positive regulation of locomotion                        | 1.104E-14 |
| 43 | anatomical structure formation involved in morphogenesis | 1.486E-14 |
| 44 | regulation of MAPK cascade                               | 1.694E-14 |
| 45 | regulation of multicellular organismal development       | 2.047E-14 |
| 46 | regulation of cell motility                              | 2.395E-14 |
| 47 | response to nitrogen compound                            | 2.845E-14 |
| 48 | positive regulation of cell differentiation              | 3.043E-14 |
| 49 | response to organonitrogen compound                      | 3.335E-14 |

|    |                            |           |
|----|----------------------------|-----------|
| 50 | animal organ morphogenesis | 4.448E-14 |
|----|----------------------------|-----------|
