# Supplementary material for: Peroxisome Metabolism Contributes to PIEZO2-Mediated Mechanical Allodynia
Source: MDPI journal article supplement (doi:10.3390/cells11111842), 2022-06-04
Supplement: s1 [file s1]

**Table S3 Enrichment by Go Process**

| #  | Processes                                                                             | p-value   |
|----|---------------------------------------------------------------------------------------|-----------|
| 1  | response to interferon-beta                                                           | 7.276E-16 |
| 2  | cellular response to interferon-beta                                                  | 2.699E-15 |
| 3  | positive regulation of response to external stimulus                                  | 8.819E-11 |
| 4  | positive regulation of defense response                                               | 1.698E-10 |
| 5  | regulation of defense response                                                        | 3.592E-10 |
| 6  | response to external stimulus                                                         | 5.960E-10 |
| 7  | regulation of multi-organism process                                                  | 7.743E-10 |
| 8  | defense response to virus                                                             | 1.163E-09 |
| 9  | regulation of response to external stimulus                                           | 2.280E-09 |
| 10 | cellular response to cytokine stimulus                                                | 3.222E-09 |
| 11 | regulation of response to biotic stimulus                                             | 4.836E-09 |
| 12 | positive regulation of multi-organism process                                         | 4.836E-09 |
| 13 | positive regulation of response to biotic stimulus                                    | 5.665E-09 |
| 14 | response to virus                                                                     | 6.766E-09 |
| 15 | response to biotic stimulus                                                           | 7.654E-09 |
| 16 | response to other organism                                                            | 1.335E-08 |
| 17 | response to external biotic stimulus                                                  | 1.402E-08 |
| 18 | immune system process                                                                 | 1.516E-08 |
| 19 | response to cytokine                                                                  | 1.696E-08 |
| 20 | regulation of immune system process                                                   | 2.034E-08 |
| 21 | regulation of large conductance calcium-activated potassium channel activity          | 3.018E-08 |
| 22 | positive regulation of large conductance calcium-activated potassium channel activity | 3.018E-08 |
| 23 | regulation of response to stress                                                      | 3.341E-08 |
| 24 | defense response                                                                      | 4.582E-08 |
| 25 | regulation of immune response                                                         | 4.895E-08 |
| 26 | positive regulation of interleukin-1 beta production                                  | 6.504E-08 |
| 27 | positive regulation of somatostatin secretion                                         | 7.006E-08 |
| 28 | positive regulation of innate immune response                                         | 7.809E-08 |
| 29 | defense response to other organism                                                    | 1.352E-07 |
| 30 | regulation of viral genome replication                                                | 1.535E-07 |
| 31 | positive regulation of immune response                                                | 1.901E-07 |
| 32 | regulation of interleukin-1 beta production                                           | 2.477E-07 |
| 33 | cellular response to organic substance                                                | 2.827E-07 |
| 34 | positive regulation of immune system process                                          | 2.857E-07 |
| 35 | multi-organism process                                                                | 3.524E-07 |
| 36 | response to organic substance                                                         | 4.513E-07 |
| 37 | positive regulation of interleukin-1 production                                       | 4.792E-07 |
| 38 | regulation of somatostatin secretion                                                  | 6.467E-07 |
| 39 | regulation of innate immune response                                                  | 8.970E-07 |
| 40 | negative regulation of viral genome replication                                       | 9.328E-07 |
| 41 | copulation                                                                            | 1.165E-06 |
| 42 | endothelin receptor signaling pathway                                                 | 1.216E-06 |
| 43 | galanin-activated signaling pathway                                                   | 1.216E-06 |
| 44 | cholecystokinin signaling pathway                                                     | 1.216E-06 |
| 45 | extracellular matrix disassembly                                                      | 1.433E-06 |
| 46 | positive regulation of response to stimulus                                           | 1.633E-06 |
| 47 | positive regulation of ion transport                                                  | 1.671E-06 |
| 48 | activation of immune response                                                         | 1.772E-06 |
| 49 | response to stress                                                                    | 1.800E-06 |

|    |                                        |           |
|----|----------------------------------------|-----------|
| 50 | regulation of interleukin-1 production | 1.869E-06 |
|----|----------------------------------------|-----------|
