# Supplementary material for: Peroxisome Metabolism Contributes to PIEZO2-Mediated Mechanical Allodynia
Source: MDPI journal article supplement (doi:10.3390/cells11111842), 2022-06-04
Supplement: s1 [file s1]

**Table S2 Enrichment by Toxicity Network**

| # | Networks                                                                      | p-value   | Network Objects                                                                  |
|---|-------------------------------------------------------------------------------|-----------|----------------------------------------------------------------------------------|
| 1 | Signal transduction_Signal transducer and activator of transcription 1, 91kDa | 9.973E-04 | HLA-DRA1, TIMP1, IRF7, PDGF-B                                                    |
| 2 | Signal transduction_Neuropeptide signaling pathway                            | 3.851E-03 | NPY, Galpha(i)-specific peptide GPCRs, Galanin                                   |
| 3 | Protein folding_p53 regulation                                                | 1.253E-02 | HSC70, HSP70                                                                     |
| 4 | Transmission of nerve impulse_Opioid, galanin and neurotensin receptors       | 1.253E-02 | GALR2, Galpha(i)-specific peptide GPCRs                                          |
| 5 | Protein folding_ATFs regulation                                               | 1.492E-02 | V1a receptor, Galpha(i)-specific peptide GPCRs, Galpha(q)-specific peptide GPCRs |
| 6 | Protein folding_HSP70 regulation by HSFs                                      | 2.086E-02 | HSC70, HSP70                                                                     |
| 7 | Inflammation_Interferon signaling                                             | 3.907E-02 | TIMP1, IRF7                                                                      |
| 8 | Immune response_CCL20                                                         | 4.611E-02 | IRAK4, TLR6                                                                      |
| 9 | Development_Cytoskeleton biogenesis                                           | 4.979E-02 | VDB, MyHC                                                                        |
