# Supplementary material for: Peroxisome Metabolism Contributes to PIEZO2-Mediated Mechanical Allodynia
Source: MDPI journal article supplement (doi:10.3390/cells11111842), 2022-06-04
Supplement: s1 [file s1]

**Table S1** qPCR Primers

| <b>Gene</b>    | <b>Forward primer</b> | <b>Reverse primer</b>   | <b>Amplicon</b> |
|----------------|-----------------------|-------------------------|-----------------|
| <i>Kcnj11</i>  | aagggcattatccctgaggaa | ttgcctttcttgacacgaag    | 110bp           |
| <i>Slc24a4</i> | ggaccggaaactgggcatc   | tgggcaagttgacgaaggtaa   | 101bp           |
| <i>Kcnd2</i>   | gggtggatgcctgttgctt   | gtcttgccatgtctggaaacg   | 120bp           |
| <i>Galanin</i> | ggcagcgttatcctgctagg  | ctgttcagggtccaacctct    | 104bp           |
| <i>Galr2</i>   | gcggtcctcgtaccctatt   | cacaggatgaaacacaggctcg  | 158bp           |
| <i>Gpr179</i>  | cactaccgtccaagccaag   | tgacagccgttgaacatctcc   | 107bp           |
| <i>Npy</i>     | atgctaggtacaagcgaatgg | tgctgcagagcggagtagtat   | 161bp           |
| <i>Gfap</i>    | cggagacgcatcacctctg   | agggagtgaggagtcattcg    | 126bp           |
| <i>mme</i>     | ctctctgtgctgtcttgctc  | gacgttgcgttcaaccagc     | 198bp           |
| <i>Cav-1</i>   | atgtctgggggcaaatacgtg | cgcgtcatacacttgcttct    | 132bp           |
| <i>Cav-2</i>   | tcaccagctcaactctcatct | gccagaaatacggtcaggaact  | 153bp           |
| <i>Lama1</i>   | cagcgccaatgtacctgt    | ggattcgactgttaccgtcaca  | 123bp           |
| <i>Eln</i>     | ttgtgatcctcttgctcaac  | gcccctggataatagactccac  | 113bp           |
| <i>Ncan</i>    | tgcaaccacggctaagctc   | ggggataagcaggcaatgac    | 165bp           |
| <i>Piezo1</i>  | ccctcaagacacagcatacca | tgcccaaaggttacagtttgtcc | 159bp           |
| <i>Piezo2</i>  | cagtaggacacacagggcg   | gttgagcagttgtaagcggg    | 139bp           |
| <i>b-Actin</i> | acaaccttctgcagctcctc  | ctgaccatacccaccatcac    | 200bp           |
