# Supplementary material for: Peroxisome Metabolism Contributes to PIEZO2-Mediated Mechanical Allodynia
Source: MDPI journal article supplement (doi:10.3390/cells11111842), 2022-06-04
Supplement: s1 [file s1]

**Table S5 Enrichment by Toxicity Network**

| #  | Networks                                                              | p-value   | Network Objects                                                                    |
|----|-----------------------------------------------------------------------|-----------|------------------------------------------------------------------------------------|
| 1  | Transport_Lipid transport                                             | 2.144E-04 | CD36, HDL proteins, SR-BI, Caveolin-1                                              |
| 2  | Transport_Vesicle-mediated transport                                  | 3.372E-03 | VDR, SR-BI, CD14                                                                   |
| 3  | Cell adhesion_Cytoskeleton regulation through CDC42                   | 5.264E-03 | RHG7, Actin cytoskeletal, Actin                                                    |
| 4  | Cell adhesion_Cytoskeleton regulation through RhoA                    | 5.818E-03 | RHG7, Actin cytoskeletal, Actin                                                    |
| 5  | Cell adhesion_Integrins signaling to Beta-catenin                     | 7.003E-03 | Frizzled, Actin cytoskeletal, WNT, Actin                                           |
| 6  | Development_Skeletal development-Osteopontin signaling                | 7.030E-03 | VDR, Actin cytoskeletal, Actin                                                     |
| 7  | Blood coagulation_Fibrinogen signaling                                | 7.030E-03 | IL-6, Actin cytoskeletal, Actin                                                    |
| 8  | Cell adhesion_PTP-1B                                                  | 8.322E-03 | Actin cytoskeletal, Actin                                                          |
| 9  | Protein folding_ATFs regulation                                       | 1.199E-02 | CCX CKR, Galpha(i)-specific peptide GPCRs, AGTR2, Galpha(q)-specific peptide GPCRs |
| 10 | Cell adhesion_p120-catenin                                            | 1.343E-02 | Actin cytoskeletal, Actin                                                          |
| 11 | Cell adhesion_Collagen III_Actin                                      | 1.343E-02 | Actin cytoskeletal, Actin                                                          |
| 12 | Transmission of nerve impulse_Ephrin receptors                        | 1.524E-02 | Ephrin-A receptor 3, Ephrin-A receptors, Actin                                     |
| 13 | Signal transduction_Wnt receptor signaling pathway                    | 1.538E-02 | Frizzled, WNT                                                                      |
| 14 | Cell adhesion_E-cadherin                                              | 1.743E-02 | Actin cytoskeletal, Actin                                                          |
| 15 | Metabolism_Histamine_ABP1                                             | 1.959E-02 | AL1A1, AOC3                                                                        |
| 16 | Signal transduction_IL-6R signaling_haptoglobin                       | 2.423E-02 | IL-6, HP                                                                           |
| 17 | Cell adhesion_Actin cytoskeleton                                      | 2.451E-02 | GPX3, Actin cytoskeletal, Actin                                                    |
| 18 | Inflammation_IL-6 signaling through gp130                             | 3.008E-02 | IL-6, HP, Transferrin                                                              |
| 19 | Inflammation_GRO-gamma signaling                                      | 3.156E-02 | IL-6, Actin cytoskeletal, Actin                                                    |
| 20 | Inflammation_Annexin A1 signaling                                     | 3.156E-02 | IL-6, Actin cytoskeletal, Actin                                                    |
| 21 | Metabolism_Lipid metabolism                                           | 3.309E-02 | APOC1, LCAT, HDL proteins                                                          |
| 22 | Cell adhesion_PAI1 signaling, PPAR-beta (delta), RXR-alpha regulation | 3.465E-02 | Frizzled, WNT, Caveolin-1                                                          |
| 23 | Cell adhesion_Cadherins                                               | 3.755E-02 | Actin cytoskeletal, Actin                                                          |
| 24 | Cell adhesion_Chemokine receptor signaling_integrin alpha-L           | 3.957E-02 | Actin cytoskeletal, CD80, Actin                                                    |
| 25 | Inflammation_Signaling to STAT3                                       | 4.128E-02 | Leptin receptor, IL-6, PDGF-B                                                      |
| 26 | Chemotaxis_Fibronectin, VEGF-A, Thrombopoietin, ENA-78 signaling      | 4.128E-02 | IL-6, Actin cytoskeletal, Actin                                                    |
| 27 | Cell adhesion_Collagen I signaling                                    | 4.128E-02 | VDR, Actin cytoskeletal, Actin                                                     |
| 28 | Inflammation_CXCR4 signaling                                          | 4.128E-02 | Galpha(i)-specific peptide GPCRs, Actin cytoskeletal, Actin                        |
| 29 | Cell adhesion_G protein alpha 12 signaling                            | 4.303E-02 | IL-6, Actin cytoskeletal, Actin                                                    |
| 30 | Inflammation_IL-8 signaling                                           | 4.303E-02 | Galpha(i)-specific peptide GPCRs, IL-6, Actin                                      |
| 31 | Inflammation_C-reactive protein                                       | 4.351E-02 | Leptin receptor, IL-6                                                              |
| 32 | Metabolism_Aldehyde metabolism                                        | 4.351E-02 | AL1A1, AOC3                                                                        |

|    |                                        |           |                                |
|----|----------------------------------------|-----------|--------------------------------|
| 33 | Metabolism_Dopamine_ABP-1              | 4.351E-02 | AL1A1, AOC3                    |
| 34 | Development_Osteoblast differentiation | 4.482E-02 | VDR, Actin cytoskeletal, Actin |
| 35 | Signal transduction_STAT6              | 4.661E-02 | Leptin receptor, PDGF-B        |
